# Supplementary material for: Effect of pyrolysis temperature on physicochemical characteristics and toxic elements for grub manure-derived biochar
Source: Royal Society of Chemistry journal article supplement (doi:10.1039/d4ra03778b), 2024-01-01
Supplement: d4ra03778b1.pdf [file d4ra03778b1.pdf]

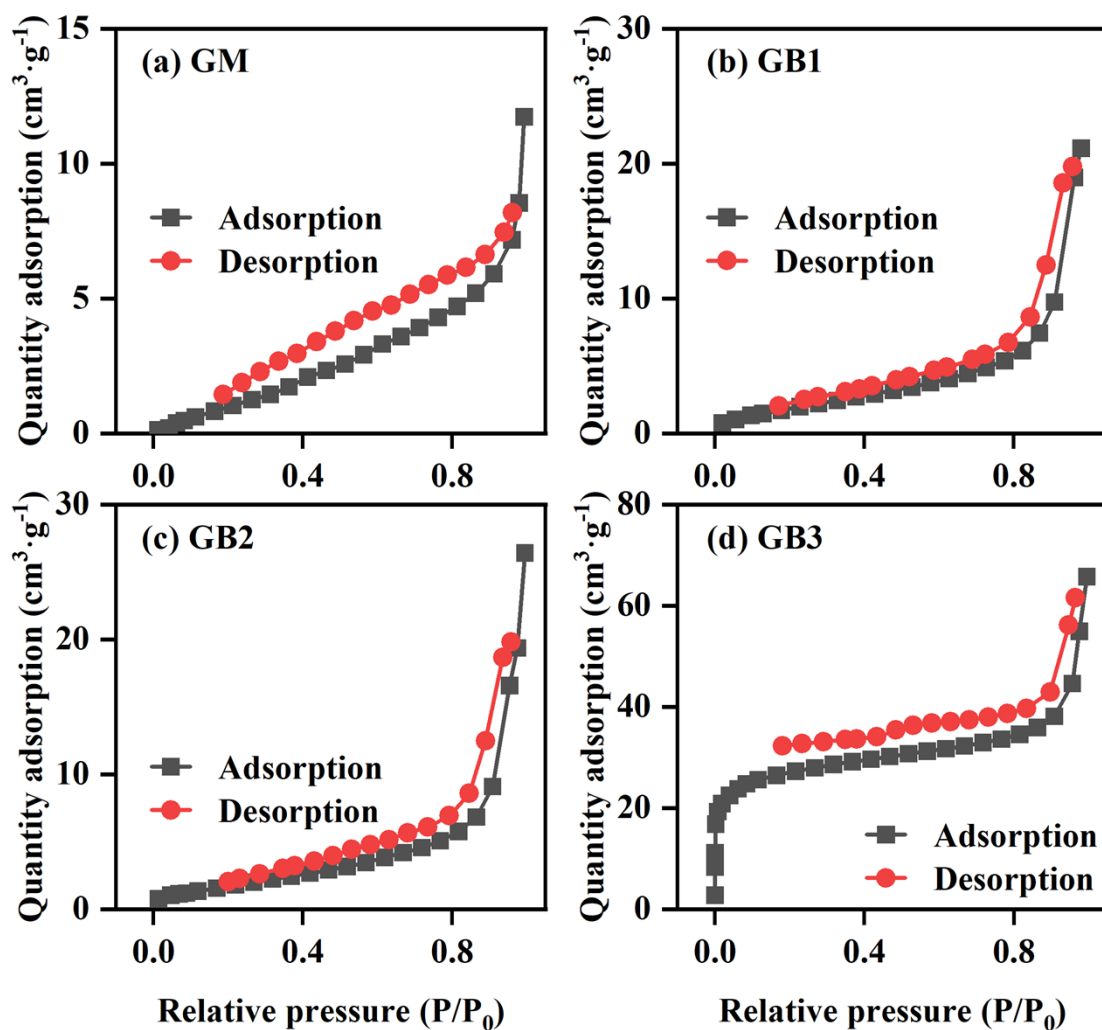

Fig. S1 The  $N_2$  adsorption-desorption curve of grub manure (GM) and grub manure-derived biochar (GB). GB1, GB2 and GB3 represents grub manure-derived biochar produced at 450, 600 and 750 °C, respectively.
